# Supplementary material
Source: publisher figshare collection journal article supplement (https://acs.figshare.com/ndownloader/files/16843781)
Supplement: Supplementary file 1 [file 16843781]

**Supporting Information containing 17 pages, 12 figures and 3 tables to accompany  
manuscript titled**

**A Modified Double Potential Step Chronoamperometry (DPSC) Method  
for As(III) Electro-oxidation and Concomitant As(V) Adsorption from  
Groundwaters**

Zhao Song,<sup>a</sup> Shikha Garg,<sup>a</sup> Jinxing Ma<sup>a</sup> and T. David Waite<sup>a,\*</sup>

<sup>a</sup> *UNSW Water Research Centre, School of Civil and Environmental Engineering, The  
University of New South Wales, Sydney, NSW 2052, Australia*

## S1: Additional experimental details

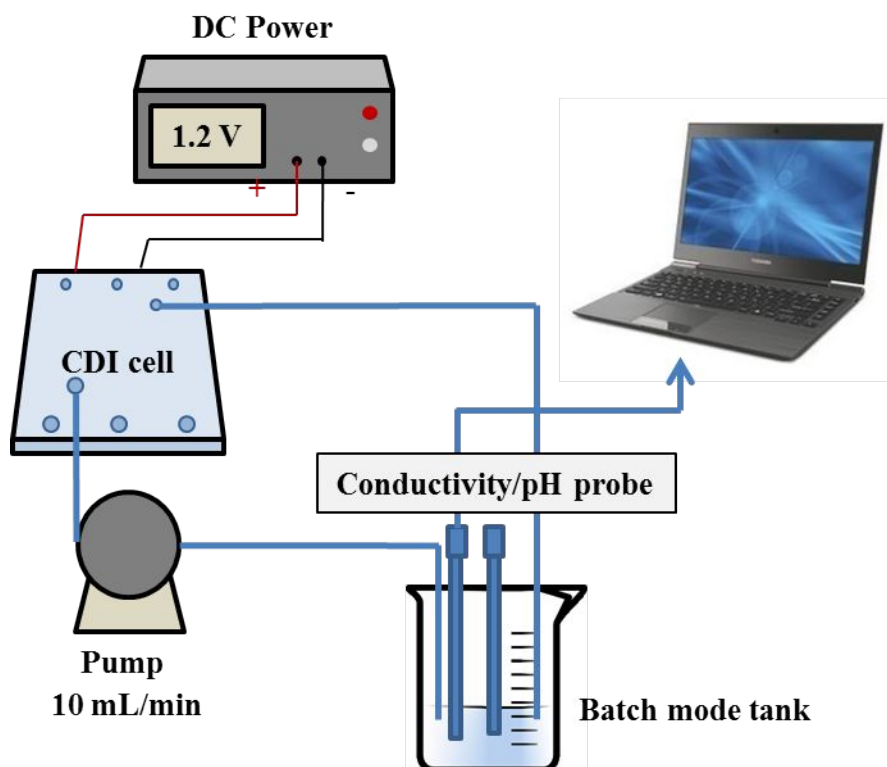

Figure S1. DPSC experimental setup

### S1.1 Calculation of electrode potential of the Ag/AgCl reference electrode

The electrode potential of Ag/AgCl at a given NaCl concentration was calculated using eq. S1. Furthermore, a correction factor of -0.07 V was applied to account for the difference in standard electrode potential of commercial Ag/AgCl electrode and the self-made Ag/AgCl electrode used here.

$$E = E_0 + 0.059 \log \frac{K_{sp}}{[Cl^-]} \quad (S1)$$

When 5 mM NaCl is used as electrolyte

$$E = -0.07 + 0.799 + 0.059 \log \frac{1.8 \times 10^{-10}}{5 \times 10^{-3}} = 0.29V \quad (S2)$$

**Table S1.** LC isocratic method and ICP-MS operating parameters.

| Parameter                    | Setting                                                             |
|------------------------------|---------------------------------------------------------------------|
| Mobile Phase                 | 10 mM Ammonium Nitrate and<br>10 mM Ammonium Phosphate<br>(dibasic) |
| Flow Rate                    | 0.6 mL/min                                                          |
| Column                       | Anion Exchange, Hamilton PRP-<br>X100, 4.1 mm i.d. × 250 mm, 10 µm  |
| Column Temperature           | Ambient                                                             |
| pH                           | 6.2                                                                 |
| Autosampler Flush<br>Solvent | 5% Methanol/95% DI Type I Water                                     |
| Sample Injection Volume      | 100 µL                                                              |
| Total Analysis Time          | 8 min                                                               |
| RF Power                     | 1500 w                                                              |
| Plasma Ar Flow               | 15 L/min                                                            |
| Nebulizer Ar Flow            | 1 L/min                                                             |
| Aux. Ar Flow                 | 1 L/min                                                             |
| Monitored Ion m/z            | 75 (75As)                                                           |
| He gas Flow                  | 0.35 mL/min                                                         |

## S2: Additional experimental results

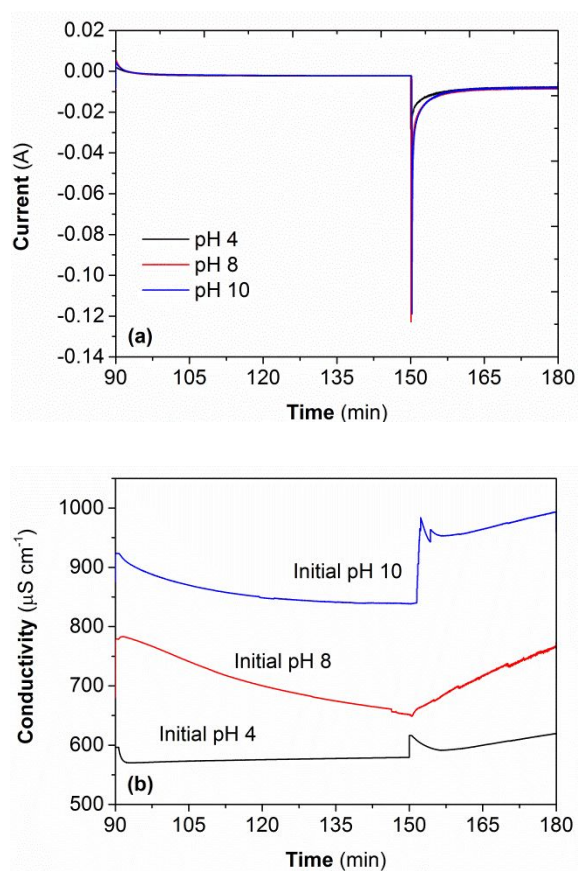

**Figure S2.** Changes in (a) current and (b) conductivity when the modified DPSC commenced with initial pH 4, 8 and 10. Experimental conditions: the feed solution contained  $C_0 = 150 \mu\text{g L}^{-1}$  As(V) and 5 mM NaCl. The initial pHs of 4, 8 and 10 were respectively controlled by addition of HCl ( $<0.1$  mM), 2 mM  $\text{NaHCO}_3$ , and 1 mM  $\text{NaHCO}_3$  and 1 mM  $\text{Na}_2\text{CO}_3$ . 1.2 V was applied at the first step for 60 min followed by  $-1.2$  V for 30 min.

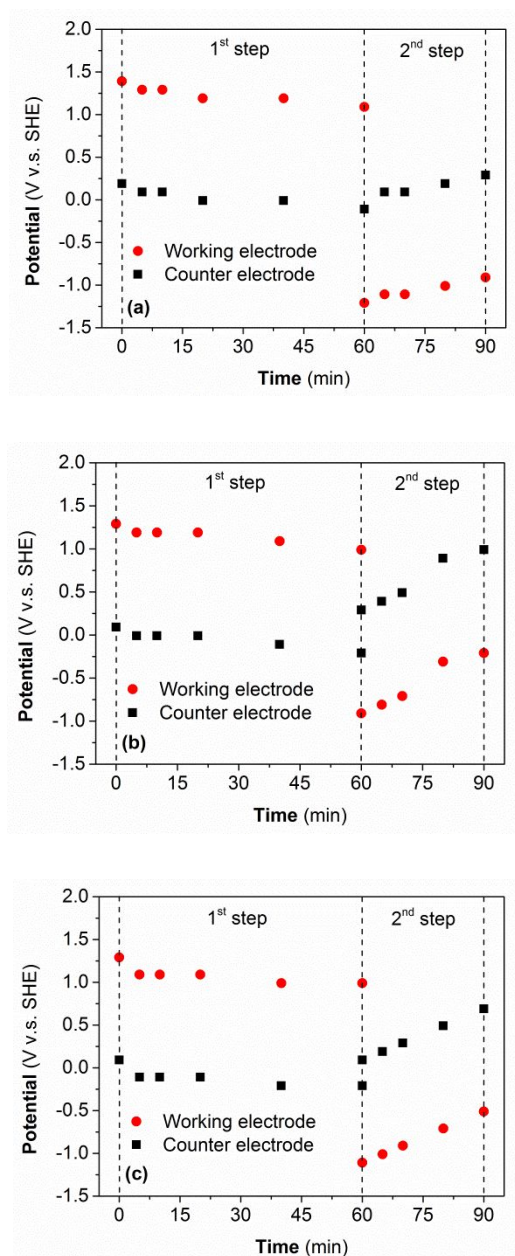

**Figure S3.** Changes in the potentials of working electrode and counter electrode versus standard hydrogen electrode (SHE) during As(III) removal at initial pH (a) 4, (b) 8 and (c) 10 during the first step and second step. Experimental conditions: the feed solution contained  $C_0 = 150 \mu\text{g L}^{-1}$  As(V) and 5 mM NaCl. The initial pHs of 4, 8 and 10 were respectively controlled by addition of HCl ( $<0.1$  mM), 2 mM  $\text{NaHCO}_3$ , and 1 mM  $\text{NaHCO}_3$  and 1 mM  $\text{Na}_2\text{CO}_3$ . 1.2 V was applied at the first step for 60 min followed by  $-1.2$  V for 30 min.

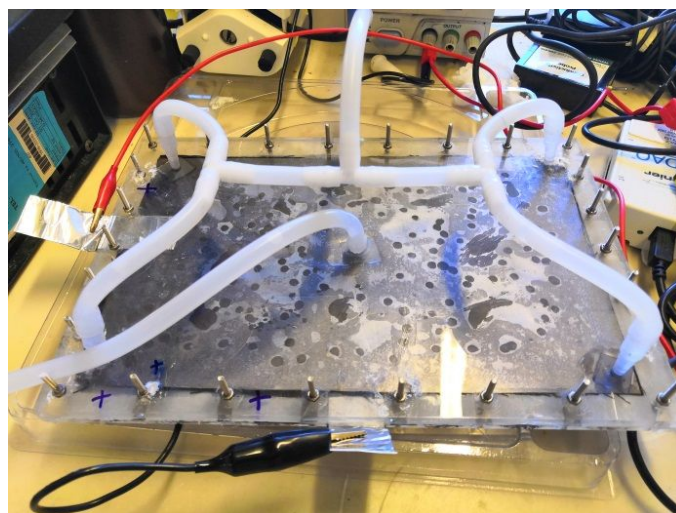

**Figure S4.** The 3<sup>rd</sup> electrochemical cell with the electrode area of  $27\text{ cm} \times 17\text{ cm}$ .

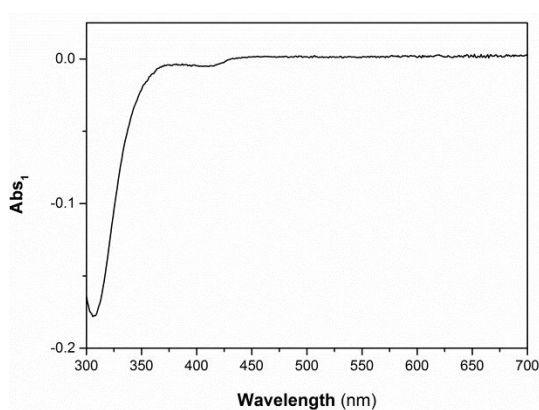

**Figure S5.** Measured absorbance  $A_\lambda$  corresponding to  $\text{OCl}^-$  formation in the experimental solution when the modified DPSC commenced with initial pH 8 at 1.2 V after 60-min adsorption. Experimental conditions: the feed solution contained  $C_0 = 150\text{ }\mu\text{g L}^{-1}$  As(III) and 5 mM NaCl.

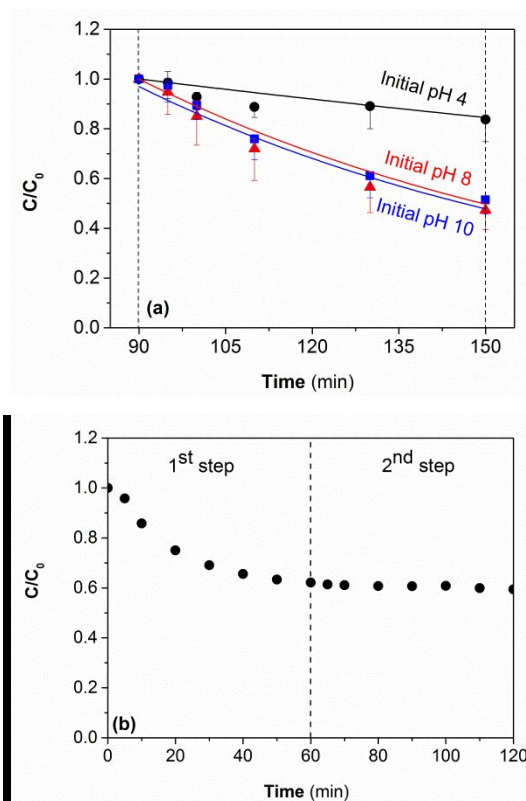

**Figure S6.** (a) Changes in aqueous As(V) concentrations when the modified DPSC commenced with initial pHs of 4, 8 and 10. Experimental conditions: the feed solution contained  $C_0 = 150 \mu\text{g L}^{-1}$  As(V) and 5 mM NaCl. The initial pHs of 4, 8 and 10 were respectively controlled by addition of HCl ( $<0.1$  mM), 2 mM  $\text{NaHCO}_3$ , and 1 mM  $\text{NaHCO}_3$  and 1 mM  $\text{Na}_2\text{CO}_3$ . No voltage was applied. (b) Changes in aqueous As(V) concentrations when the modified DPSC commenced with initial pH 4. Experimental conditions: the feed solution contained  $C_0 = 150 \mu\text{g L}^{-1}$  As(V) and 5 mM NaCl. 1.2 V was applied at the first step for 60 min followed by 0 V for 30 min.

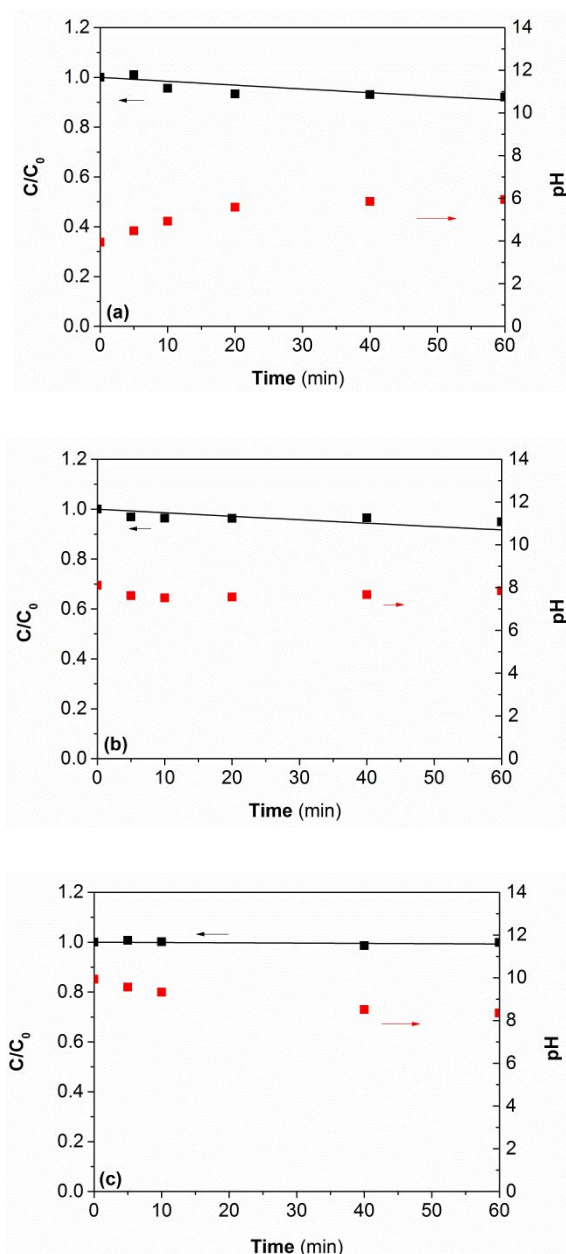

**Figure S7.** Changes in total As concentration (black squares) and pH (red circles) when the modified DPSC commenced with initial (a) pH 4, (b) 8 and (c) 10. Experimental conditions: the feed solution contained  $C_0 = 150 \mu\text{g L}^{-1}$  As(III) and 5 mM NaCl. The initial pH 4, 8 and 10 were respectively controlled by addition of HCl ( $<0.1$  mM), 2 mM  $\text{NaHCO}_3$ , and 1 mM  $\text{NaHCO}_3$  and 1 mM  $\text{Na}_2\text{CO}_3$ ). No voltage was applied.



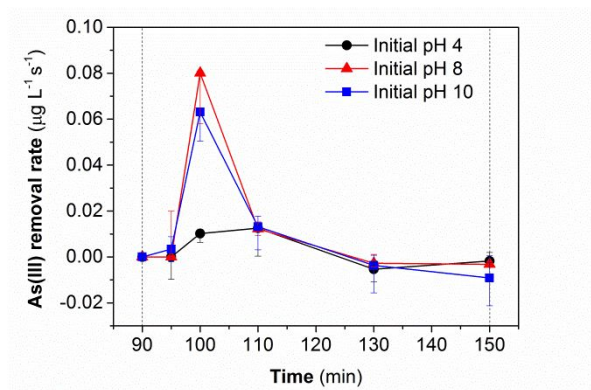

**Figure S8.** Changes in measured As(III) removal rate with time in the DPSC setup at varying pH conditions. Experimental conditions: the feed solution contained  $C_0 = 150 \mu\text{g L}^{-1}$  As(III) and 5 mM NaCl. The initial pH 4, 8 and 10 were respectively controlled by addition of HCl ( $<0.1$  mM), 2 mM  $\text{NaHCO}_3$ , and 1 mM  $\text{NaHCO}_3$  and 1 mM  $\text{Na}_2\text{CO}_3$ ).

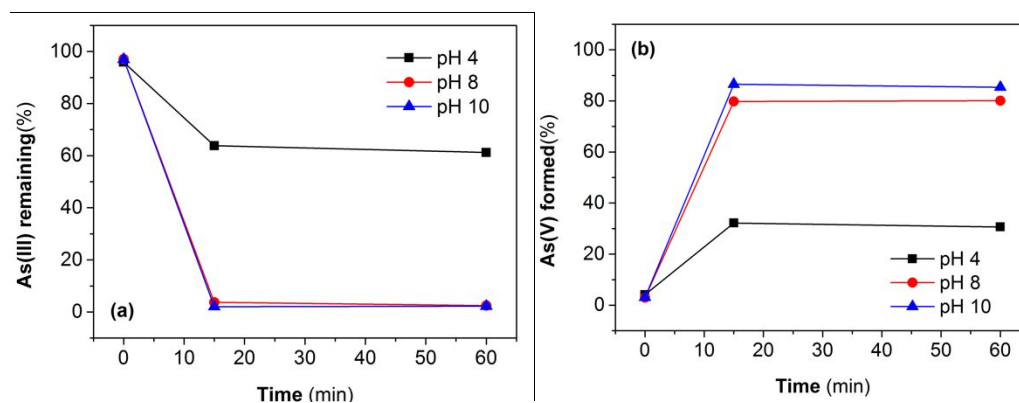

**Figure S9** (a) % of As(III) remaining (b) % As(V) formed on As(III) oxidation during 60 mins when  $150 \mu\text{g L}^{-1}$  As(III) is added to pH 4, 8 and 10 solution containing  $160 \mu\text{M H}_2\text{O}_2$

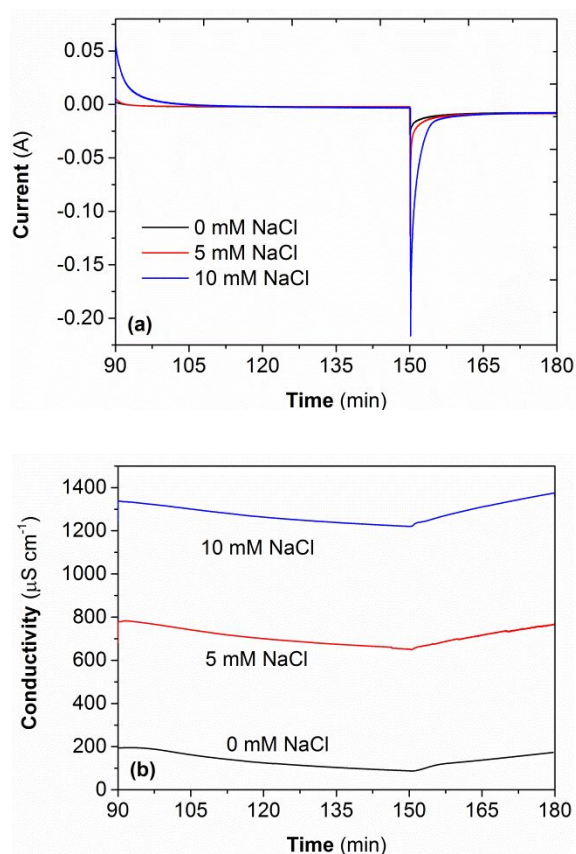

**Figure S10.** Changes in (a) current and (b) conductivity when the modified DPSC commenced with initial pH 8 and 0, 5 mM and 10 mM NaCl. Experimental conditions: the feed solution contained  $C_0 = 150 \mu\text{g L}^{-1}$  As(III). 1.2 V was applied at the first step for 60 min followed by  $-1.2$  V for 30 min.

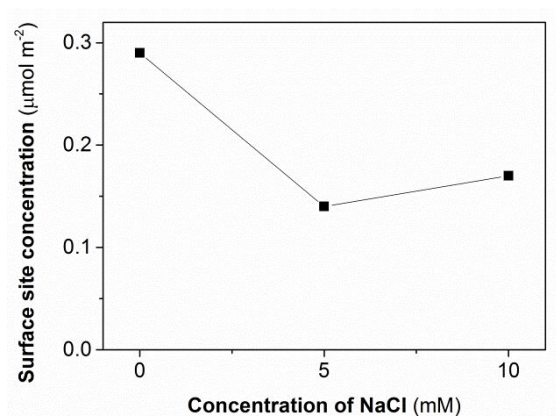

**Figure S11.** Surface site concentration available for As adsorption in the presence of varying NaCl concentration. (Surface site concentration:  $C_s = (\Delta C \times V) / A$  where  $\Delta C$  is the change in aqueous As(III) concentration;  $V$  is the volume of the batch, 60 mL;  $A$  is the surface area of the working electrode).

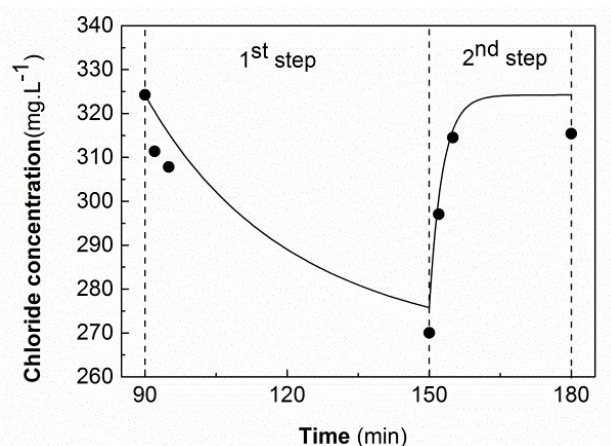

**Figure S12.** Change in  $\text{Cl}^-$  concentration when the modified DPSC commenced with initial 8. Experimental conditions: the feed solution contained  $\text{As(V)} = 150 \mu\text{g L}^{-1}$   $\text{As(III)}$  and 5 mM NaCl. +1.2 V is applied in the 1<sup>st</sup> step followed by -1.2 V in the 2<sup>nd</sup> step.

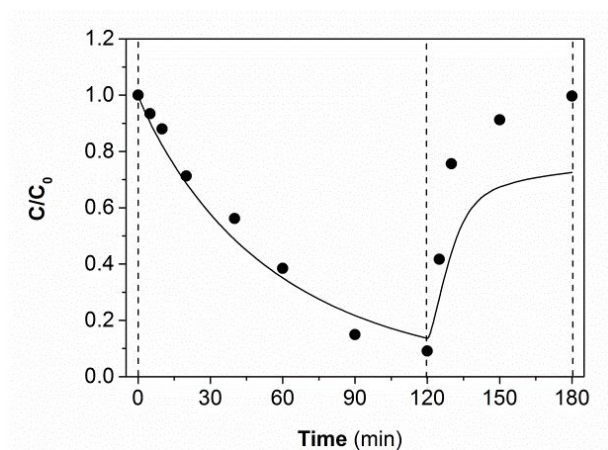

**Figure S13.** Changes in total arsenic concentration when  $150 \mu\text{g.L}^{-1}$   $\text{As(III)}$  is added to solution at initial pH 8 and +1.2 V is applied for 120 min followed by -1.2 V for 60 min using electrochemical cell with electrode area  $10 \text{ cm} \times 8 \text{ cm}$ . Symbols represent experimental data; lines represent model value.

**Table S2.** Parameters for the calculation of the energy cost of DPSC for removal of As(III) during 120-min adsorption in the bigger electrochemical cell

| Parameters                         | Unit           | Value              |
|------------------------------------|----------------|--------------------|
| $U$                                | V              | 1.2                |
| $I_t$                              | A              | Figure S14         |
| $\int_0^t I_t dt$                  | A.h            | 0.003 <sup>a</sup> |
| $V$                                | m <sup>3</sup> | 0.00006            |
| $\log\left(\frac{C_o}{C_e}\right)$ |                | $\log(150/15)$     |

<sup>a</sup>: the value of 0.003 represents the integrated current during step 1 over a period of 120 min.

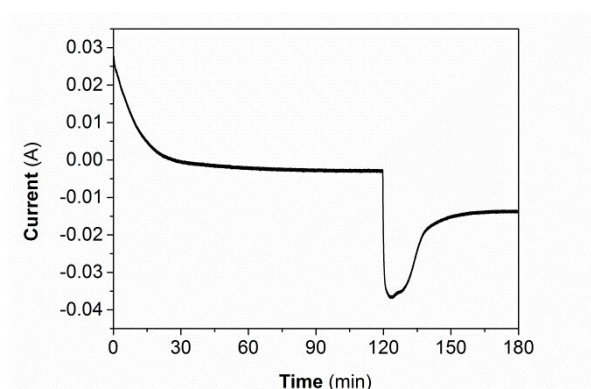

**Figure S14.** Change in current when the modified DPSC commenced with initial pH 8. Experimental conditions: the feed solution contained  $C_0 = 150 \mu\text{g L}^{-1}$  As(V) and 5 mM NaCl. The initial pH of 8 was controlled by addition of 2 mM  $\text{NaHCO}_3$ . 1.2 V was applied at the first step for 120 min followed by  $-1.2$  V for 60 min in the electrochemical cell with electrode area  $10 \text{ cm} \times 8 \text{ cm}$ .

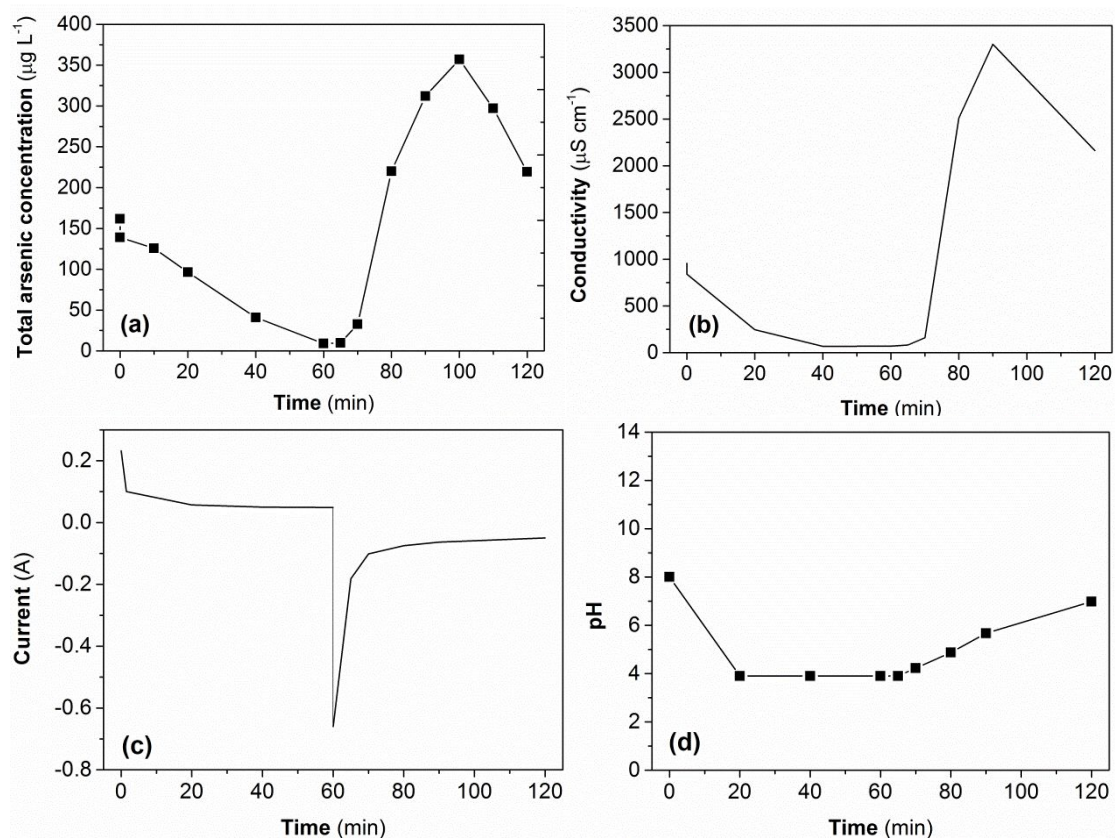

**Figure S15.** Changes in (a) total arsenic concentration; (b) conductivity; (c) current; (d) pH when  $161 \mu\text{g.L}^{-1}$  As(III) is added to solution at initial pH 8 and +1.2 V is applied for 60 min followed by -1.2 V for 60 min using electrochemical cell with electrode area  $27 \text{ cm} \times 17 \text{ cm}$  shown in Figure S4 in a single-pass mode.

### **S3: Detailed description of the kinetic model**

#### **S3.1 Acid-base equilibrium of As(V) and As(III)**

Reactions 1-8 (Table 1) represent the acid-base equilibrium reactions for the various As(III) and As(V) species. The  $pK_a$  values for these reactions were used as reported in the literature. As mentioned in the main text, we have assumed that the dominant As species in the solution and on the surface are the same and, as such, we have used the same  $pK_a$  values for adsorbed As(III) and As(V) species as that used for the dissolved species.

#### **3.2 Physical adsorption of As(V) and As(III)**

Reactions 9-12 represent the physical adsorption of As(V) and As(III) species to the working electrode. The rate constants for reactions 9 and 10 were determined based on the measured As(V) physical adsorption under varying initial pH conditions (Figure S4). The rate constants for reactions 11 and 12 were determined based on the best-fit to measured physical adsorption of As(III) under varying initial pH conditions (Figure S5). These reactions occur at the first step as well as the second step.

#### **3.3 Electro-adsorption of $Cl^-$**

Reaction 13 represents the electro-adsorption of chloride ions on the anode with the rate constant for this reaction determined based on the time dependence of  $Cl^-$  removal in our electrochemical cell (Figure S12).

#### **3.4 Electro-sorption of As(III) at the anode**

Reaction 14 represents the adsorption of deprotonated As(III) species when a voltage of 1.2 V is applied. Note that electro-adsorption of the neutral As(III) is expected to be negligible and hence is not included in the model.

#### **3.5 Electro-sorption of As(V) at the anode**

Reactions 15-17 represent electro-adsorption of various As(V) species. The rate constants for these reactions were determined based on the measured As(V) removal under varying initial pH conditions (Figure 2). As shown, the rate constant for electro-sorption increases with increase in charge of the As(V) species with completely deprotonated As(V) species (i.e.

$\text{AsO}_4^{3-}$ ) adsorbing at a higher rate constant compared to the protonated forms ( $\text{H}_2\text{AsO}_4^-$  and  $\text{HAsO}_4^-$ ) consistent with the observed effect of pH on As(V) electro-adsorption.

### **3.6 Electro-desorption of As(III)**

Reaction 18 represents desorption of As(III) from the electrode when the polarity is reversed and -1.2 V voltage is applied. The rate constant for these reactions were determined based on the best fit to the measured As(III) concentration released during step 2 in Figure 4.

### **3.7 Electro-desorption of As(V)**

Reactions 19-21 represent the desorption of As(V) when -1.2 V voltage is applied. The rate constant for these reactions were determined based on best fit to the measured As(V) concentration released during step 2 in Figures 2 and 4.

### **3.8 Anodic oxidation of As(III)**

Reactions 22 and 23 represent the anodic oxidation of dissolved neutral and deprotonated As(III) species respectively near the electrode surface when a potential of +1.2 V is applied. Reactions 24 and 25 represents the anodic oxidation of neutral and deprotonated surface As(III) species respectively on the electrode surface when a potential of +1.2 V is applied. The rate constant for these reactions were determined based on the best fit to the measured As(III) and As(V) concentrations when As(III) is added and DPSC is commenced (Figure 4). Note that the rate constant for oxidation of the deprotonated form is higher than for neutral As(III) species which is in agreement with the reported rate constant for these species by various other oxidants such as  $\text{H}_2\text{O}_2$ .<sup>1</sup>

### **3.9 $\text{H}_2\text{O}_2$ -mediated oxidation of As(III)**

Reactions 26 and 27 represent the oxidation of As(III) by  $\text{H}_2\text{O}_2$  that is formed on reduction of  $\text{O}_2$  when a voltage of -1.2 V is applied. The rate constant for these reactions were determined based on the best-fit to the measured As(III) and As(V) concentrations during step 2 (Figure 4). Note that the rate constant for  $\text{H}_2\text{O}_2$ -mediated oxidation of As(III) used here is much lower than the reported rate value.<sup>2</sup> While the exact reason for this discrepancy is not clear, it may be due to the presence of  $\text{H}_2\text{O}_2$  on or near the surface while As(III) is present in solution.

### 3.10 Non-Faradaic reactions

Reactions 28 and 29 represent the formation and consumption of protons respectively during the first and second step respectively as a result of Faradaic reactions.<sup>2,3</sup> The rate constants for these reactions vary with As species present (i.e. As(III) or As(V)) and pH as well as with the potential applied and were determined based on the best-fit to measured pH values during first and second step for different initial pH values when As(V) (Figure 2c) and As(III) (Figure 3c) were added. The values of the rate constants used for various initial conditions are provided in Table S3.

**Table S3** Rate constants for proton formation/consumption under different conditions.

| Proton formation/consumption during As(V) removal in the first step    |                                     |                                      |
|------------------------------------------------------------------------|-------------------------------------|--------------------------------------|
| pH 4                                                                   | pH 8                                | pH 10                                |
| $1 \times 10^{-7} \text{ s}^{-1}$                                      | $4 \times 10^{-8} \text{ s}^{-1}$   | $8 \times 10^{-7} \text{ s}^{-1}$    |
| 0                                                                      | $1.5 \text{ s}^{-1}$                | $240 \text{ s}^{-1}$                 |
| Proton formation/consumption during As(V) removal in the second step   |                                     |                                      |
| pH 4                                                                   | pH 8                                | pH 10                                |
| $1 \times 10^{-9} \text{ s}^{-1}$                                      | $1 \times 10^{-20} \text{ s}^{-1}$  | $1 \times 10^{-20} \text{ s}^{-1}$   |
| $4.73 \times 10^{-3} \text{ s}^{-1}$                                   | 30                                  | $300 \text{ s}^{-1}$                 |
| Proton formation/consumption during As(III) removal in the first step  |                                     |                                      |
| pH 4                                                                   | pH 8                                | pH 10                                |
| $3 \times 10^{-6} \text{ s}^{-1}$                                      | $9.5 \times 10^{-8} \text{ s}^{-1}$ | $1.01 \times 10^{-6} \text{ s}^{-1}$ |
| $1 \times 10^{-2} \text{ s}^{-1}$                                      | 0                                   | $41 \text{ s}^{-1}$                  |
| Proton formation/consumption during As(III) removal in the second step |                                     |                                      |
| pH 4                                                                   | pH 8                                | pH 10                                |
| $6 \times 10^{-3} \text{ s}^{-1}$                                      | $800 \text{ s}^{-1}$                | 800                                  |
| $1 \times 10^{-19} \text{ s}^{-1}$                                     | $1 \times 10^{-19} \text{ s}^{-1}$  | $1 \times 10^{-19} \text{ s}^{-1}$   |

### 3.11 Faradaic reaction resulting in H<sub>2</sub>O<sub>2</sub> generation and consumption

Reactions 30-33 represent H<sub>2</sub>O<sub>2</sub> formation and decay during the second step as a result of Faradaic reactions.<sup>2,4</sup> The rate constants for these reactions were determined based on best-fit to the measured H<sub>2</sub>O<sub>2</sub> concentration in our experimental system (Figure 5a) and were



independent of solution pH. The rate constants for the Faradaic reactions used are close to the values reported in an earlier study.<sup>2</sup>

## References

1. E. V. i. L'udovit Molmir, Peter Lech, *Hydrometallurgy*, 1994, **35**, 1-9.
2. D. He, C. E. Wong, W. Tang, P. Kovalsky and T. D. Waite, *Environmental Science & Technology Letters*, 2016, **3**, 222-226.
3. W. Tang, D. He, C. Zhang, P. Kovalsky and T. D. Waite, *Water Res*, 2017, **120**, 229-237.
4. T. Kim, J. Yu, C. Kim and J. Yoon, *Journal of Electroanalytical Chemistry*, 2016, **776**, 101-104.
